# Supplementary material
Source: publisher figshare collection journal article supplement (https://gsajournals.figshare.com/articles/dataset/_/14593902)
Supplement: Supplementary file 1 [file 1]

## Sheet: Sheet1
Table S2 Fly strains generated
Name	Description	Genotype
25709 w-	Autosomes from BDSC #25709 (2nd chromosome attP landing site) and X chromosome from BDSC #24749 (w).	y[1] M{RFP[3xP3.PB] GFP[E.3xP3]=vas-int.Dm}ZH-2A w[*]; P{y[+t7.7]=CaryP}attP40
pCFD4-D𝛽1-ex3	Transgenic sgRNA stock. sgRNAs targeting D𝛽1 5'UTR and D𝛽1 exon 3 are ubiquitously expressed (5'UTR_sgRNA and sgRNA1).	y[1] v[1] P{y[+t7.7]=nos-phiC31\int.NLS}X; P{pCFD4-D𝛽1-ex3}attP40
D𝛽1∆ex3	Contains a deletion in the D𝛽1 gene from the 5'UTR to exon 3. Maintained over fluorescent third chromosome balancer.	w[1118];+;D𝛽1∆ex3/TM3, P{w+mC=ActGFP}JMR2, Ser1
D𝛽1-TG4	Contains a T2A-GAL4 cassette in the first coding intron of the D𝛽1 gene. Maintained over fluorescent third chromosome balancer.	w[1118];+;TI{RFP[3xP3.PB]=T-GEM}nAChRbeta1/TM3, P{w+mC=ActGFP}JMR2, Ser1
elav-GAL4; D𝛽1sgRNAs	Pan-neuronal GAL4 expression. Ubiquitous expression of sgRNAs targetting D𝛽1 5'UTR and D𝛽1 exon 5 (5'UTR_sgRNA and sgRNA2).	P{w[+mW.hs]=GawB}elav[C155]; P{pCFD4-D𝛽1}attP40; +
D𝛽1sgRNAs; CCAP-GAL4	GAL4 expression in the CCAP-neurons. Ubiquitous expression of sgRNAs targetting D𝛽1 5'UTR and D𝛽1 exon 5 (5'UTR_sgRNA and sgRNA2).	w[*]; P{pCFD4-D𝛽1}attP40; P{w[+mC]=CCAP-GAL4.P}9
burs-GAL4; UAS-Cas9	GAL4 expression in the bursicon-positive CCAP-neurons. Cas9 under control of the UAS promotor.	w[*]; P{w[+mC]=Burs-GAL4.P}P12; P{y[+t7.7] w[+mC]=UAS-Cas9.C}attP2
UAS-D𝛽1	D𝛽1 cDNA under control of the UAS promotor.	y[1] M{RFP[3xP3.PB] GFP[E.3xP3]=vas-int.Dm}ZH-2A w[*]; P{w[+mC]=UAS-D𝛽1}attP40; +
UAS-D𝛽1; D𝛽1∆ex5	D𝛽1 cDNA under control of the UAS promotor. D𝛽1∆ex5 deletion maintained over fluorescent third chromosome balancer.	w[*]; P{w[+mC]=UAS-D𝛽1}attP40; D𝛽1∆ex5/TM3, P{w+mC=ActGFP}JMR2, Ser1
elav-GAL4; D𝛽1∆ex5	Pan-neuronal GAL4 expression. D𝛽1∆ex5 deletion maintained over fluorescent third chromosome balancer.	P{w[+mW.hs]=GawB}elav[C155]; +; D𝛽1∆ex5/TM3, P{w+mC=ActGFP}JMR2, Ser1
CCAP-GAL4,D𝛽1∆ex5	GAL4 expression in the CCAP-neurons. The third chromosome CCAP-GAL4 driver has been recombined with the D𝛽1∆ex5 deletion. Maintained over fluorescent third chromosome balancer.	w[*];+;D𝛽1∆ex5, P{w[+mC]=CCAP-GAL4.P}9/TM3, P{w+mC=ActGFP}JMR2, Ser1
burs-GAL4; D𝛽1∆ex5	GAL4 expression in the bursicon-positive CCAP-neurons. D𝛽1∆ex5 deletion maintained over fluorescent third chromosome balancer.	w[*]; P{w[+mC]=Burs-GAL4.P}P12; D𝛽1∆ex5/TM3, P{w+mC=ActGFP}JMR2, Ser1
